# Supplementary material
Source: Springer Nature journal article supplement (https://www.springermedizin.de/resource/supplementary/12881_2005_120_MOESM2_ESM.pdf/9452456)

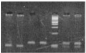

Supplement: MOESM2 [file 9452456]
